# Supplementary material
Source: publisher figshare collection journal article supplement (https://acs.figshare.com/ndownloader/files/24082717)
Supplement: Supplementary file 1 [file 24082717]

# Supporting Information

## Rapid and Stable Detection of Carbon Monoxide in Changing Humidity Atmospheres Using Clustered In<sub>2</sub>O<sub>3</sub>/CuO Nanospheres

Yongjiao Sun,<sup>†</sup> Zhenting Zhao,<sup>‡</sup> Koichi Suematsu,<sup>§</sup> Pengwei Li,<sup>†</sup> Zhichao Yu,<sup>†</sup>  
Wendong Zhang,<sup>†</sup> Jie Hu,<sup>\*,†</sup> and Kengo Shimano<sup>\*,§</sup>

<sup>†</sup>Micro and Nano System Research Center, College of Information and Computer,  
Taiyuan University of Technology, Taiyuan 030024 P. R. China

<sup>‡</sup>Laboratory of Electronic Functional Materials, Huizhou University, Huizhou 516001  
P. R. China

<sup>§</sup>Department of Advanced Materials Science and Engineering, Faculty of Engineering  
Sciences, Kyushu University, Kasuga, Fukuoka 816-8580, Japan

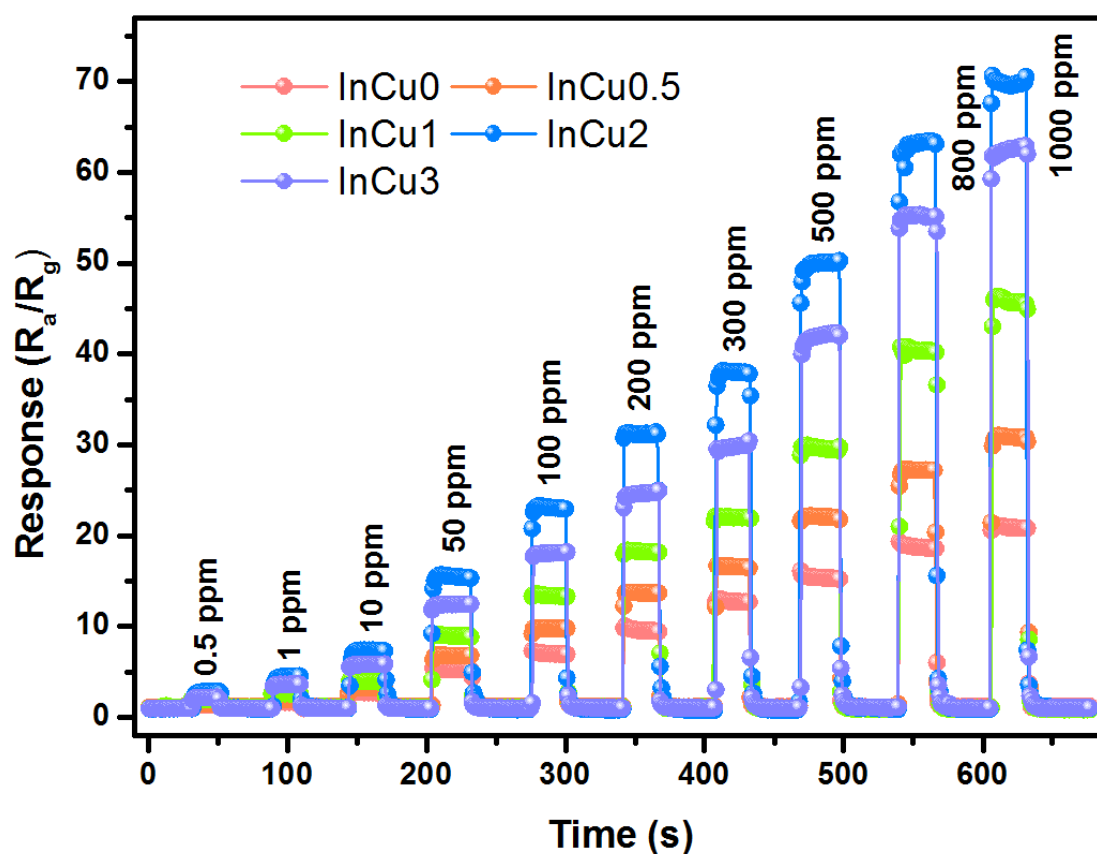

**Figure S1.** Dynamic response of all the sensors upon exposure to different concentration of CO.

Figure S1 presents the real-time dynamic response curves of all the sensors upon exposure to different concentration of CO at 200°C. As the same as the resistance change curves, all gas sensors exhibited quick responses and recovery to CO. The response of all the sensors remarkably increased when increasing the CO concentration. A significant increase in the sensor response at each concentration is clearly observed with the addition of CuO, especially for InCu2, which is consistent with the data shown in Figure 4a. Besides, the limit of detection (LOD) for CO of the  $\text{In}_2\text{O}_3$  sensors can down to 0.5 ppm. And InCu2 displays a high response of 2.83 to 0.5 ppm CO.

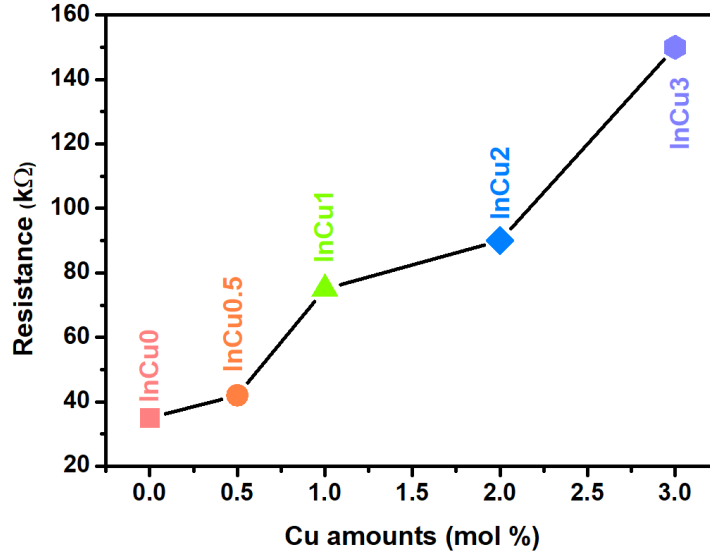

**Figure S2.** Electric resistance in air versus Cu amount under optimal working temperature of 200°C.

Figure S2 displays the electric resistance value of each gas sensor in air at their optimal working temperature of 200°C, respectively. It is clearly that the electric resistances increase with the raise of Cu amount, indicating higher resistance value of  $\text{In}_2\text{O}_3$  contain p-h junction. This result is similar with previous works [1, 2].

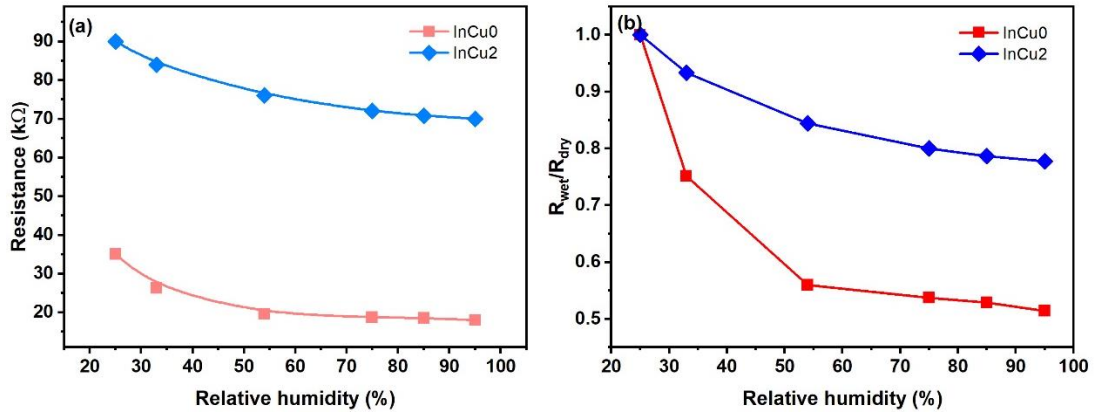

**Figure S3.** (a) Electric resistance in air versus relative humidity under optimal working temperature of 200°C; (b) the corresponding  $R_{\text{wet}}/R_{\text{dry}}$  values of InCu0 and InCu2.

Figure S3a exhibits the electric resistance value of InCu0 and InCu2 based gas sensors in air under different relative humidity at 200°C, respectively. The electric resistance of both sensors was reduced dramatically in the low concentration of water vapor. However, the change tended to become small with the raise of the relative

humidity, which is similar with our earlier research [3]. Further, the electric resistances of InCu2 were 2.5 and 3.9 times higher than those of InCu0 in wet atmosphere of 25% RH and 95% RH, respectively. The ratios of the sensor resistances in air ( $R_{\text{wet}}/R_{\text{dry}}$ ) under different degree of wet and relative dry atmosphere were calculated to quantify the effect of humidity on the chemiresistive sensing behaviors of the InCu0 and InCu2 (Figure S3b). Sensor with  $R_{\text{wet}}/R_{\text{dry}}=1$  shows the humidity-independent response. The lower the value of  $R_{\text{wet}}/R_{\text{dry}}$ , the greater the effect of moisture on the resistance. Evidently, the  $R_{\text{wet}}/R_{\text{dry}}$  of InCu2 is higher than that of InCu0 under 33% RH, 54% RH, 75% RH, 85% RH and 95% RH, which suggests that the reduction of electric resistance in wet atmosphere is suppressed by loading CuO.

## References

- [1] Choi, S. J.; Kim, M. P.; Lee, S. J.; Kim, B. J.; Kim, I. D. Facile Au catalyst loading on the inner shell of hollow SnO<sub>2</sub> spheres using Au-decorated block copolymer sphere templates and their selective H<sub>2</sub>S sensing characteristics. *Nanoscale* **2014**, *6*, 11898-11903.
- [2] Hwang, I. S.; Choi, J. K.; Woo, H. S.; Kim, S. J.; Jung, S. Y.; Seong, T. Y.; Kim, I. D.; Lee, J. H. Facile control of C<sub>2</sub>H<sub>5</sub>OH sensing characteristics by decorating discrete Ag nanoclusters on SnO<sub>2</sub> nanowire networks. *ACS Appl. Mater. Interfaces* **2011**, *3*, 3140-3145.
- [3] Sun, Y. J.; Suematsu, K.; Watanabe, K.; Nishibori, M.; Hu, J. Zhang, W. D.; Shimanoe, K. Determination of effective oxygen adsorption species for CO sensing based on electric properties of indium oxide. *J. Electrochem. Soc.* **2018**, *165*, B275-B280.
